# Supplementary material for: Stable and efficient dye-sensitized solar cells: photophysical and electrical characterizations
Source: Royal Society of Chemistry journal article supplement (doi:10.1039/c0ee00264j), 2010-01-01
Supplement: c0ee00264j.pdf [file c0ee00264j.pdf]

## **Electronic Supplementary Information**

### **Stable and efficient dye-sensitized solar cells: photophysical and electrical characterizations**

Qingjiang Yu, Difei Zhou, Yushuai Shi, Xiaoying Si, Yinghui Wang and Peng Wang\*

*State Key Laboratory of Polymer Physics and Chemistry, Changchun Institute of Applied Chemistry,*

*Chinese Academy of Sciences, Changchun 130022, China*

**Gel electrolyte preparation.** Silica nanoparticles (10 wt%) with a primary particle size of ~10-nm were mixed with E2 to form a gel electrolyte, which can be transformed into liquid after a 5-min sonication.

**Device fabrication.** A double-layer titania film was used as the negative electrode. A 10- $\mu\text{m}$ -thick transparent layer of 23-nm-sized titania particles was first screen-printed onto a pre-cleaned fluorine-doped tin oxide (FTO) conducting glass electrode (Nippon Sheet Glass, Solar, 4-mm-thick), and subsequently coated by a 5- $\mu\text{m}$ -thick second layer of scattering titania particles (WERO-2, Dyesol). A cycloidal titania electrode ( $\sim 0.28 \text{ cm}^2$ ) was stained by immersing it into a dye solution containing C106 (150  $\mu\text{M}$ ) and chenodeoxycholic acid (2 mM) in the mixture of acetonitrile and *tert*-butanol (volume ratio: 1/1) overnight. The dye-coated titania electrode was subsequently washed with acetonitrile, and then assembled with a thermally platinized FTO positive electrode (TEC 15  $\Omega/\square$ , Libbey-Owens-Ford Industries, 2.2 mm thick). The two active electrodes were separated with a 30- $\mu\text{m}$ -thick Bynel (DuPont) hot-melt gasket and sealed up by heating. The internal space was filled with electrolytes using a vacuum back filling system. The electrolyte-injecting hole on the counter electrode was made with a sand-blasting drill, and was sealed with a Bynel sheet and a thin glass cover by heating.

**Photovoltaic measurements and stability Tests.** A Keithley 2400 source meter and a Zolix Omni- $\lambda$ 300 monochromator equipped with a 500 W xenon lamp were used to measure photocurrent action spectra, with a wavelength sampling interval of 10 nm and a current sampling time of 2 s under the full computer control. Monochromatic incident photon-to-collected electron conversion efficiency (IPCE) is defined by  $\text{IPCE}(\lambda) = hcJ_{\text{sc}}/e\phi\lambda$ , where  $h$  is the Planck constant,  $c$  is the light speed in vacuum,  $e$  is the electronic charge,  $\lambda$  is the wavelength,  $J_{\text{sc}}$  is the short-circuit photocurrent density and  $\phi$  is the incident radiative flux. A Hamamatsu S1337-1010BQ silicon diode used for IPCE measurements was calibrated

in National Institute of Metrology, China. During the photocurrent action spectrum measurements, a white LED is used to bias a testing cell with  $\sim 1.0 \text{ mA cm}^{-2}$  background current.

A model LS1000-4S-AM1.5G-1000W solar simulator (Solar Light Company, USA) in combination with a metal mesh was employed to give an irradiance of  $100 \text{ mW cm}^{-2}$ . The light intensity was tested with a PMA2144 pyranometer and a calibrated PMA 2100 dose control system.  $J-V$  characteristics were obtained by applying a potential bias to a testing cell and measuring the photocurrent with a Keithley 2602 source meter under the full computer control. The measurements were fully automated using Labview 8.0. A metal mask with an aperture area of  $0.158 \text{ cm}^2$  was covered on a testing cell during all measurements. An antireflection film ( $\lambda < 380 \text{ nm}$ , ARKTOP, ASAHI Glass) is adhered to the DSC photoanode during IPCE and  $J-V$  measurements. Solar cells covered with a  $50\text{-}\mu\text{m}$ -thick of polyester film (Preservation Equipment Ltd, UK) as a  $400 \text{ nm}$  UV cut-off filter were irradiated at open circuit under a Suntest CPS plus lamp (ATLAS GmbH,  $100 \text{ mW cm}^{-2}$ ) in ambient air at  $60 \text{ }^\circ\text{C}$ .  $J-V$  measurements were carried out at room temperature after allowing the cells to cool down and equilibrate in 30 min.

**Transient absorption measurements.** Transient absorption measurements were carried out with a LP920 laser flash spectrometer in conjunction with a nanosecond tunable OPOlett-355II laser. The sample was kept at a  $45^\circ$  angle to the excitation beam. The probe light from a pulsed xenon arc lamp was passed through various optical elements, samples and a monochromator before being detected by a fast photomultiplier tube and recorded with a TDS 3012C digital signal analyzer.

**Electrical impedance measurements.** Electrical impedance experiments were carried out under illumination of a red LED with an IM6ex electrochemical workstation, with a frequency range from 50

mHz to 100 kHz and a potential modulation of 20 mV. A bias potential was applied to equal the open-circuit voltage at each irradiation intensity. The obtained impedance spectra were fitted with the Z-view software (v2.80, Scribner Associates Inc.).

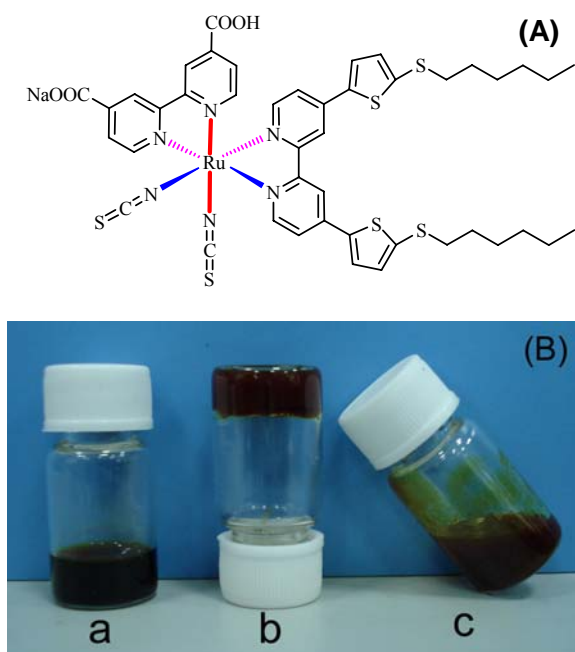

**Fig. S1.** (A) Molecular structure of the C106 sensitizer. (B) Photograph of (a) electrolyte E2 and (b) its quasi-solid state counterpart with silica nanoparticles. A 5-min sonication of the solid electrolyte can generate a colloidal solution as depicted in photograph (c).

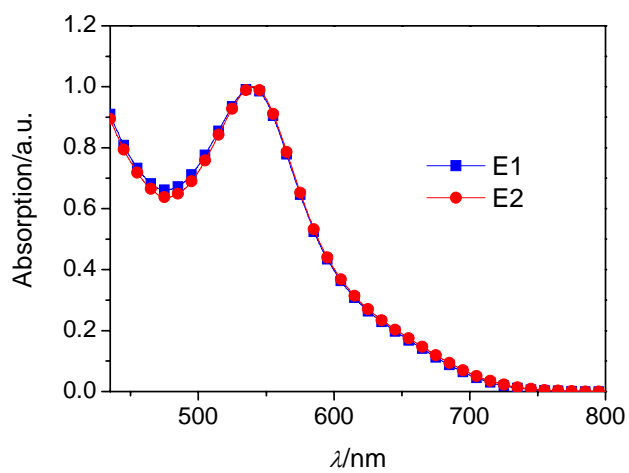

**Fig. S2** Normalized absorption spectra of the C106-coated titania films immersed in electrolytes E1 and E2.

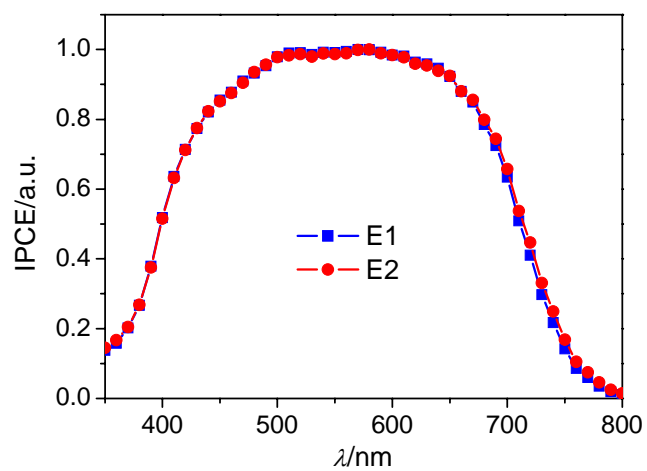

**Fig. S3** Normalized photocurrent action spectra of the C106 sensitizer in conjunction with electrolytes E1 and E2.

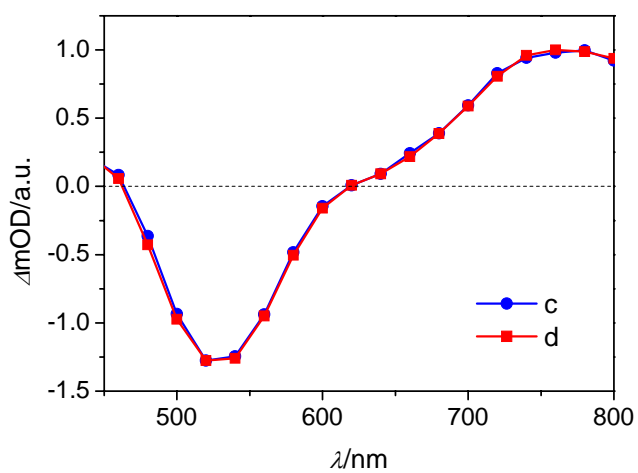

**Fig. S4** Normalized transient absorption spectra of the C106-coated titania films immersed in electrolytes c and d.



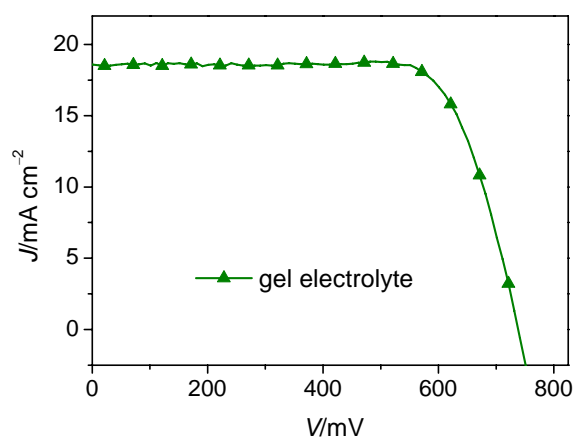

**Fig. S5**  $J$ - $V$  characteristic of C106 in combination with the gel electrolyte measured under irradiation of  $100 \text{ mW cm}^{-2}$  AM1.5G sunlight. Test was carried out using a metal mask with an aperture area of  $0.158 \text{ cm}^2$ . An antireflection film was adhered to the cell during the measurement.

**Table S1** Detailed photovoltaic parameters of DSCs in conjunction with the three electrolytes measured at different incident light intensities.<sup>a</sup>

| electrolyte     | $P_{in}/\text{mW cm}^{-2}$ | $J_{sc}/\text{mA cm}^{-2}$ | $V_{oc}/\text{mV}$ | FF   | $\eta/\%$ |
|-----------------|----------------------------|----------------------------|--------------------|------|-----------|
| E1              | 14.39                      | 2.17                       | 724                | 0.81 | 8.9       |
|                 | 26.14                      | 3.95                       | 742                | 0.81 | 9.1       |
|                 | 53.26                      | 7.88                       | 761                | 0.80 | 9.0       |
|                 | 100                        | 14.97                      | 782                | 0.75 | 8.8       |
| E2              | 14.39                      | 2.51                       | 699                | 0.81 | 10.0      |
|                 | 26.14                      | 4.66                       | 717                | 0.80 | 10.2      |
|                 | 53.26                      | 9.46                       | 736                | 0.77 | 10.1      |
|                 | 100                        | 17.57                      | 753                | 0.76 | 10.0      |
| gel electrolyte | 14.39                      | 2.57                       | 686                | 0.81 | 9.9       |
|                 | 26.14                      | 4.65                       | 703                | 0.80 | 10.0      |
|                 | 53.26                      | 9.41                       | 723                | 0.78 | 10.0      |
|                 | 100                        | 17.62                      | 741                | 0.75 | 9.8       |

<sup>a</sup>The spectral distribution of our light resource simulates AM1.5G solar emission with a mismatch less than 4%. Lights at different intensities were obtained by attenuating the AM1.5G full sunlight with a set of neutral meshes. Incident power intensity:  $P_{in}$ ; Short-circuit photocurrent density:  $J_{sc}$ ; Open-circuit photovoltage:  $V_{oc}$ ; Fill factor: FF; Total power conversion efficiency:  $\eta$ . Cell area tested with a metal mask:  $0.158 \text{ cm}^2$ . An antireflection film was adhered to testing cells during measurements.

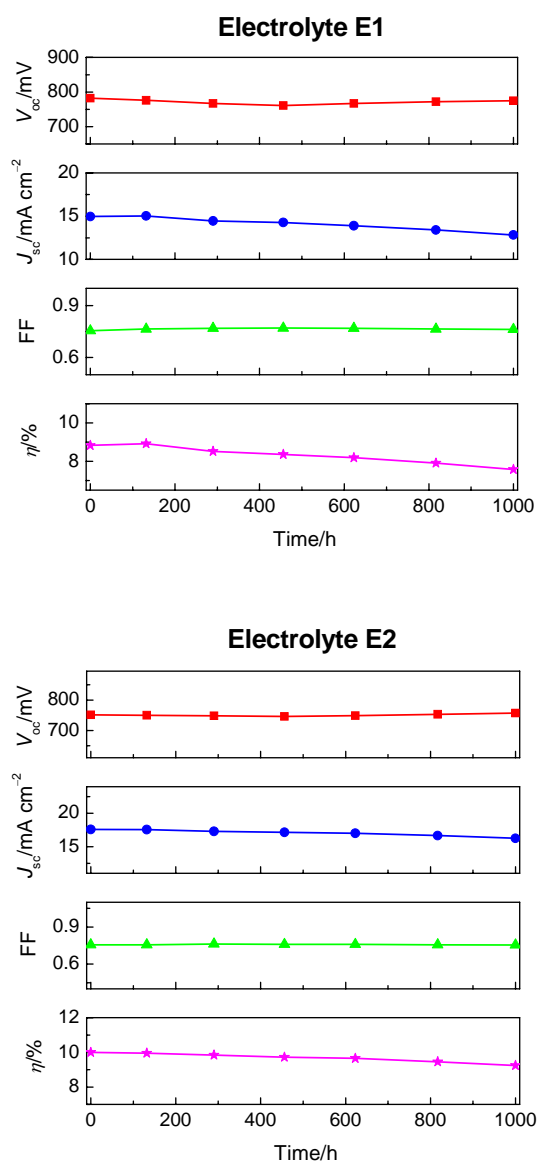

**Fig. S6** Detailed photovoltaic parameters measured under the irradiance of  $100\ mW\ cm^{-2}$  AM1.5G sunlight for cell in combination with electrolytes E1 and E2 during successive full sunlight soaking at  $60\ ^\circ C$  for 1000 h.
